# Supplementary material for: Calcium current modulation by the γ1 subunit depends on alternative splicing of CaV1.1
Source: PubMed Central journal article supplement (PMC9037348; doi:10.1085/jgp.202113028), 2022-03-29

FIGURE 1B

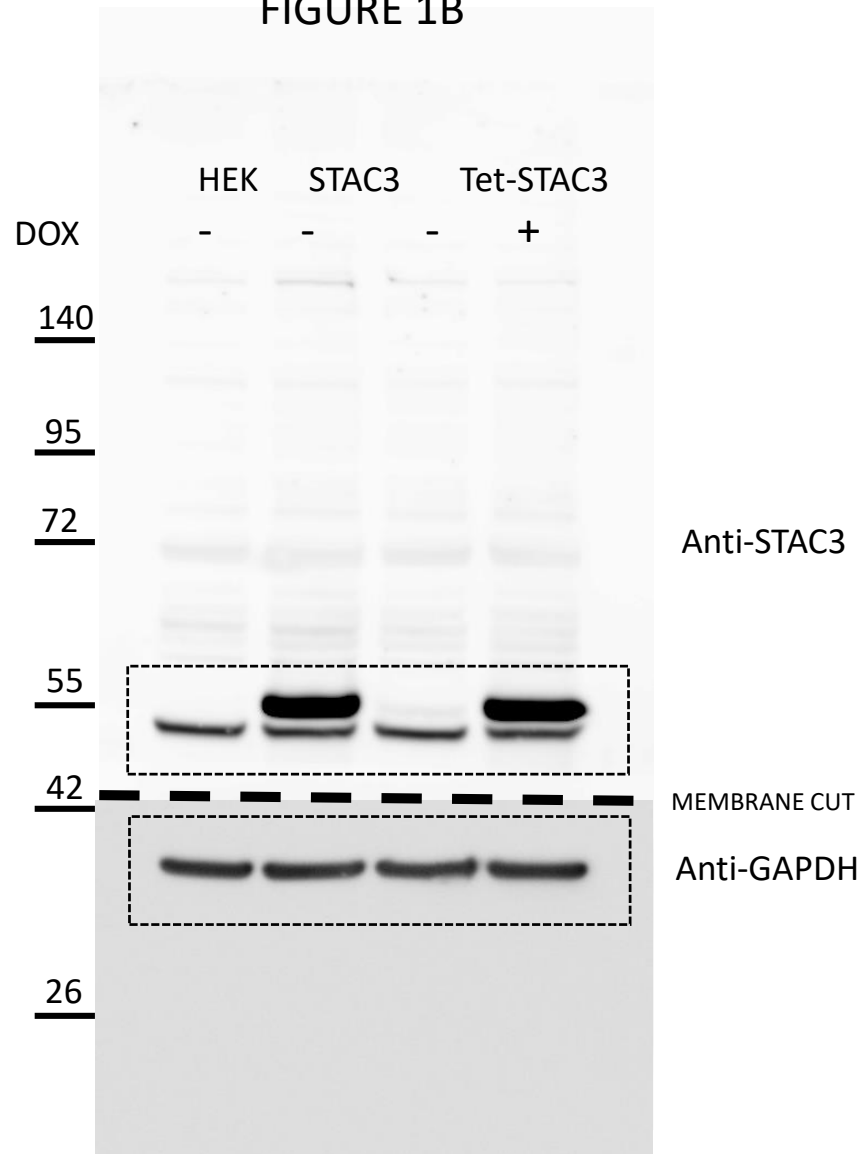

Supplement: JGP_202113028_SourceDataF1.pdf [file JGP_202113028_SourceDataF1.pdf]
